# Supplementary material for: Site-specific bioorthogonal protein labelling by tetrazine ligation using endogenous β-amino acid dienophiles
Source: PubMed Central journal article supplement (PMC10533398; doi:10.1038/s41557-023-01252-8), 2023-07-03

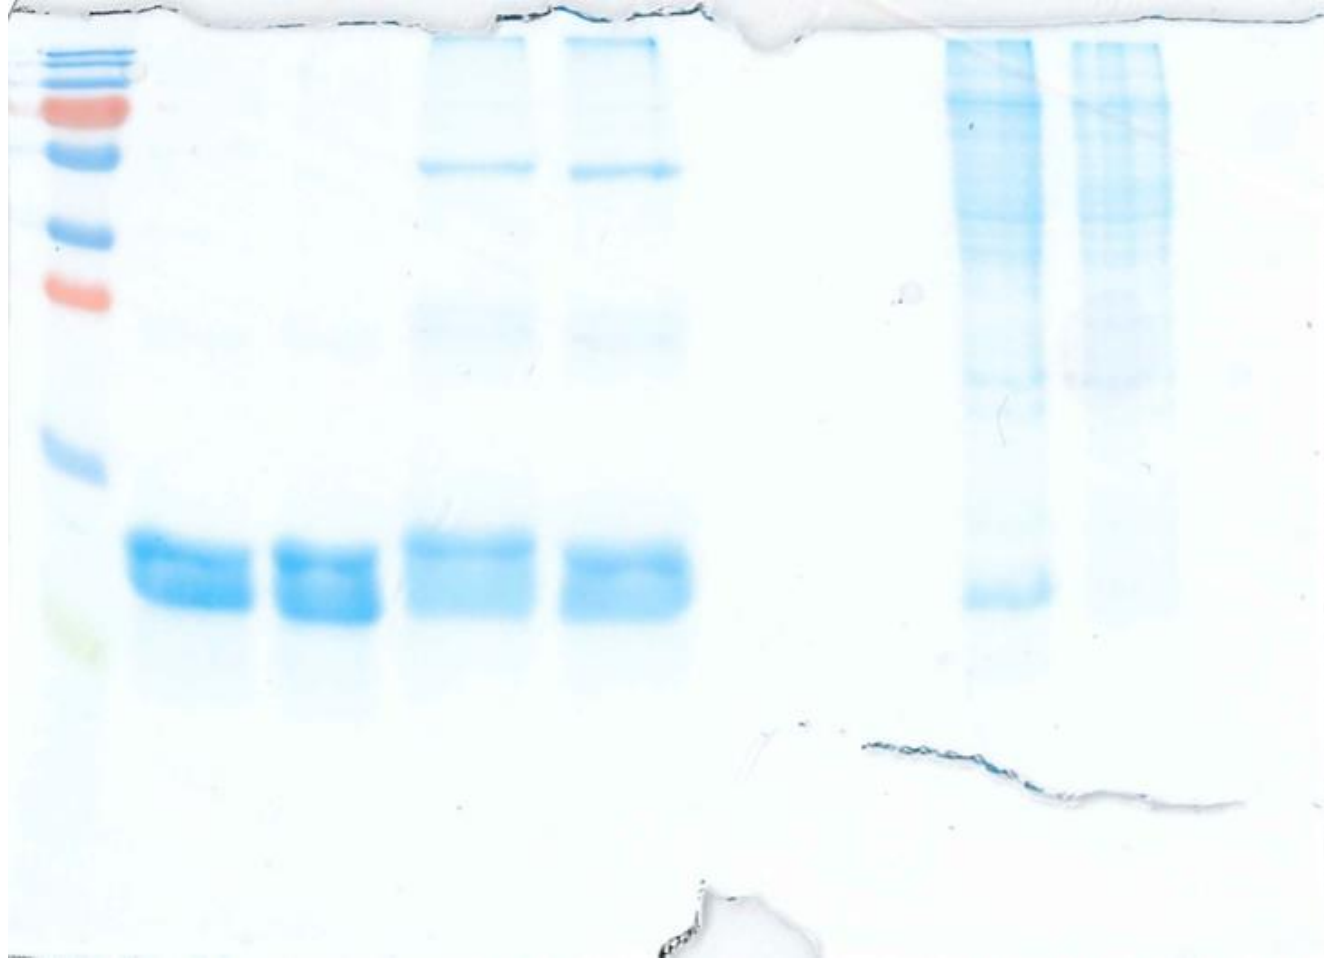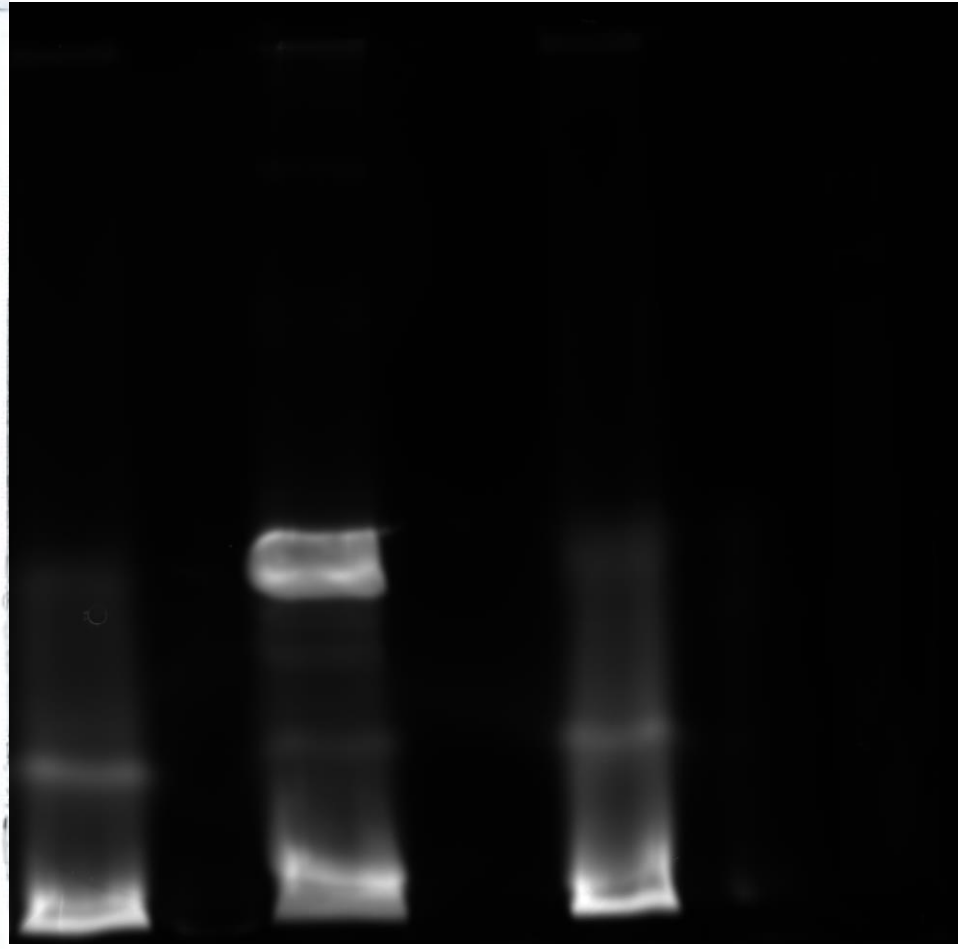

Supplement: 41557_2023_1252_MOESM4_ESM.pdf [file 41557_2023_1252_MOESM4_ESM.pdf]
